# Supplementary material for: Methylation Pattern of the SOCS3 and IL6R Promoters in Rheumatoid Arthritis
Source: Hindawi journal article supplement (doi:10.1155/2020/8394659), 2020-03-31
Supplement: f1 [file 8394659.f1.pdf]

## Supplementary data

Methylation pattern of the *SOCS3* and *IL6R* promoters in rheumatoid arthritis.

Cieśla M. et al.

Table S1. Genotypes and alleles distribution.

| <i>SOCS3</i> SNPs | Allele/<br>Genotype    | Number of carriers (%)    |                           |                                |                            |                        |                     |                                               |
|-------------------|------------------------|---------------------------|---------------------------|--------------------------------|----------------------------|------------------------|---------------------|-----------------------------------------------|
|                   |                        | RA RF-positive,<br>n = 82 | RA RF-negative,<br>n = 40 | RA ACPA-<br>positive,<br>n=104 | RA ACPA-<br>negative, n=18 | RA overall,<br>n = 122 | Controls,<br>n = 24 | Subjects in a<br>methylation<br>study, n = 76 |
| <b>rs4969168</b>  | <b>MAF (A allele)</b>  | 11%                       | 15%                       | 12.5%                          | 11.1%                      | 12.3%                  | 10.4%               | 6.6%                                          |
|                   | GG                     | 67 (81.7)                 | 28 (70)                   | 81 (77.9)                      | 14 (77.8)                  | 95 (77.9)              | 19 (79.2)           | 66 (86.8)                                     |
|                   | GA                     | 12 (14.6)                 | 12 (30)                   | 20 (19.2)                      | 4 (22.2)                   | 24 (19.7)              | 5 (20.8)            | 10 (13.2)                                     |
|                   | AA                     | 3 (3.7)                   | 0                         | 3 (2.9)                        | 0                          | 3 (2.5)                | 0                   | 0                                             |
|                   | <b>Allele/Genotype</b> |                           |                           |                                |                            |                        |                     |                                               |
| <b>rs4969170</b>  | <b>MAF (A allele)</b>  | 29.9%                     | 35%                       | 30.3%                          | 38.9%                      | 31.6%                  | 45.8%               | 30.9%                                         |
|                   | GG                     | 41 (50)                   | 17 (42.5)                 | 51 (49)                        | 7 (38.9)                   | 58 (47.5)              | 7 (29.2)            | 36 (47.4)                                     |
|                   | GA                     | 33 (40.2)                 | 18 (45)                   | 43 (41.3)                      | 8 (44.4)                   | 51 (41.8)              | 12 (50)             | 33 (43.4)                                     |
|                   | AA                     | 8 (9.8)                   | 5 (12.5)                  | 10 (9.6)                       | 3 (16.7)                   | 13 (10.7)              | 5 (20.8)            | 7 (9.2)                                       |
|                   | <b>Allele/Genotype</b> |                           |                           |                                |                            |                        |                     |                                               |

Abbreviations: ACPA; Anti-citrullinated protein antibodies; MAF, minor allele frequency; RA, rheumatoid arthritis patients; RF, rheumatoid factor; SNP, single nucleotide polymorphism; *SOCS3*; suppressor of cytokine signaling 3 gene.

Table S2. Distribution of genotypes in a different genetic models between patients and controls.

| <b>SOCS3<br/>SNPs</b> | <b>Model</b>                     | <b>RA,<br/>n=122</b>        | <b>Controls,<br/>n=24</b> | <b>OR [95% CI]</b>   | <b>p-value</b> | <b>Fisher's exact p-value</b> |
|-----------------------|----------------------------------|-----------------------------|---------------------------|----------------------|----------------|-------------------------------|
| <b>rs4969168</b>      | <b>Codominant 1</b> GG vs. GA    | 95 (77.9)<br>vs. 24 (19.7)  | 19 (79.2) vs. 5 (20.8)    | 0.96 [0.32-<br>2.87] | 0.94           | 0.57                          |
|                       | <b>Codominant 2</b> GG vs. AA    | 95 (77.9)<br>vs. 3 (2.5)    | 19 (79.2) vs. 0           | nd.                  |                | 0.58                          |
|                       | <b>Dominant</b> GA+AA vs. GG     | 27 (22.1)<br>vs. 95 (77.9)  | 5 (20.8) vs. 19 (79.2)    | 0.93 [0.31-<br>2.74] | 0.89           | 0.56                          |
|                       | <b>Overdominant</b> GA vs. GG+AA | 24 (19.7)<br>vs. 98 (80.3)  | 5 (20.8) vs. 19 (79.2)    | 0.93 [0.31-<br>2.76] | 0.9            | 0.54                          |
|                       | <b>Recessive</b> AA vs. GA+GG    | 3 (2.5)<br>vs. 119 (97.5)   | 0 vs. 24 (100)            | nd.                  |                | 0.58                          |
| <b>rs4969170</b>      | <b>Codominant 1</b> GG vs. GA    | 58 (47.5)<br>vs. 51 (41.8)  | 7 (29.2) vs. 12 (50)      | 0.51 [0.19-<br>1.42] | 0.19           | 0.14                          |
|                       | <b>Codominant 2</b> GG vs. AA    | 58 (47.5)<br>vs. 13 (10.7)  | 7 (29.2) vs. 5 (20.8)     | 0.31 [0.08-<br>1.17] | 0.09           | 0.08                          |
|                       | <b>Dominant</b> GA+AA vs. GG     | 64 (52.5)<br>vs.58 (47.5)   | 17 (70.8)<br>vs. 7 (29.2) | 0.45 [0.17-<br>1.18] | 0.09           | 0.07                          |
|                       | <b>Overdominant</b> GA vs. GG+AA | 51 (41.8)<br>vs. 71 (58.2)  | 12 (50) vs. 12 (50)       | 0.72 [0.3-1.74]      | 0.46           | 0.3                           |
|                       | <b>Recessive</b> AA vs. GA+GG    | 13 (10.7)<br>vs. 109 (89.3) | 5 (20.8) vs. 19 (79.2)    | 0.45 [0.14-<br>1.43] | 0.19           | 0.15                          |
|                       |                                  |                             |                           |                      |                |                               |

Data are presented as number (%). Abbreviations: CI, confidence interval; OR, odds ratio. For other please refer to Table S1 in supplementary file.

Table S3. Distribution of genotypes in a different genetic models between rheumatoid factor positive and rheumatoid factor negative patients.

| <b>SOCS3<br/>SNPs</b> | <b>Model</b>                     | <b>RF positive,<br/>n=82</b> | <b>RF negative,<br/>n=40</b> | <b>OR [95% CI]</b>   | <b>p-value</b> | <b>Fisher's exact p-value</b> |
|-----------------------|----------------------------------|------------------------------|------------------------------|----------------------|----------------|-------------------------------|
| <b>rs4969168</b>      | <b>Codominant 1</b> GG vs. GA    | 67 (81.7)<br>vs. 12 (14.6)   | 28 (70) vs. 12 (30)          | 2.39 [0.95-<br>6.02] | 0.06           | 0.0504                        |
|                       | <b>Codominant 2</b> GG vs. AA    | 67 (81.7)<br>vs. 3 (3.7)     | 28 (70) vs. 0                | nd.                  |                | 0.36                          |
|                       | <b>Dominant</b> GA+AA vs. GG     | 15 (18.3)<br>vs. 67 (81.7)   | 12 (30) vs. 28 (70)          | 0.52 [0.22-<br>1.27] | 0.15           | 0.11                          |
|                       | <b>Overdominant</b> GA vs. GG+AA | 12 (14.6)<br>vs. 70 (85.4)   | 12 (30) vs. 28 (70)          | 0.4 [0.16-1.00]      | 0.05014        | <b>0.0412</b>                 |
|                       | <b>Recessive</b> AA vs. GA+GG    | 3 (3.7)<br>vs. 79 (96.3)     | 0 vs. 40 (100)               | nd.                  |                | 0.30                          |
| <b>rs4969170</b>      | <b>Codominant 1</b> GG vs. GA    | 41 (50)<br>vs. 33 (40.2)     | 17 (42.5) vs. 18 (45)        | 1.32 [0.58-<br>2.97] | 0.50           | 0.32                          |
|                       | <b>Codominant 2</b> GG vs. AA    | 41 (50)<br>vs. 8 (9.8)       | 17 (42.5) vs. 5 (12.5)       | 1.51 [0.42-<br>5.39] | 0.53           | 0.37                          |
|                       | <b>Dominant</b> GA+AA vs. GG     | 41 (50)<br>vs. 41 (50)       | 23 (57.5)<br>vs. 17 (42.5)   | 0.74 [0.34-1.6]      | 0.44           | 0.28                          |
|                       | <b>Overdominant</b> GA vs. GG+AA | 33 (40.2)<br>vs. 49 (59.8)   | 18 (45) vs. 22 (55)          | 0.82 [0.38-<br>1.78] | 0.62           | 0.38                          |
|                       | <b>Recessive</b> AA vs. GA+GG    | 8 (9.8)<br>vs. 74 (90.2)     | 5 (12.5) vs. 35 (87.5)       | 0.76 [0.23-<br>2.51] | 0.65           | 0.43                          |
|                       |                                  |                              |                              |                      |                |                               |

Data are presented as number (%). Abbreviations: please refer to Tables S1 and S2 in supplementary file.

Table S4. Distribution of genotypes in a different genetic models between anti-citrullinated protein antibodies positive and anti-citrullinated protein antibodies negative patients.

| <b>SOCS3 SNPs</b> | <b>Model</b>                     | <b>ACPA positive, n=104</b> | <b>ACPA negative, n=18</b> | <b>OR [95% CI]</b> | <b>p-value</b> | <b>Fisher's exact p-value</b> |
|-------------------|----------------------------------|-----------------------------|----------------------------|--------------------|----------------|-------------------------------|
| <b>rs4969168</b>  | <b>Codominant 1</b> GG vs. GA    | 81 (77.9)<br>vs. 20 (19.2)  | 14 (77.8) vs. 4 (22.2)     | 0.86 [0.25-2.95]   | 0.82           | 0.51                          |
|                   | <b>Codominant 2</b> GG vs. AA    | 81 (77.9)<br>vs. 3 (2.9)    | 14 (77.8) vs. 0            | nd.                |                | 0.63                          |
|                   | <b>Dominant</b> GA+AA vs. GG     | 23 (22.1)<br>vs. 81 (77.9)  | 4 (22.2) vs. 14 (77.8)     | 0.99 [0.32-3.09]   | 0.99           | 0.6                           |
|                   | <b>Overdominant</b> GA vs. GG+AA | 20 (19.2)<br>vs. 84 (80.8)  | 4 (22.2) vs. 14 (77.8)     | 0.83 [0.24-2.84]   | 0.77           | 0.49                          |
|                   | <b>Recessive</b> AA vs. GA+GG    | 3 (2.9)<br>vs. 101 (97.1)   | 0 vs. 18 (100)             | nd.                |                | 0.62                          |
| <b>rs4969170</b>  | <b>Codominant 1</b> GG vs. GA    | 51 (49)<br>vs. 43 (41.3)    | 7 (38.9) vs. 8 (44.4)      | 0.74 [0.24-2.23]   | 0.58           | 0.39                          |
|                   | <b>Codominant 2</b> GG vs. AA    | 51 (49)<br>vs. 10 (9.6)     | 7 (38.9) vs. 3 (16.7)      | 0.46 [0.1-2.13]    | 0.33           | 0.26                          |
|                   | <b>Dominant</b> GA+AA vs. GG     | 53 (51)<br>vs. 51 (49)      | 11 (61.1)<br>vs. 7 (38.9)  | 0.66 [0.24-1.86]   | 0.42           | 0.3                           |
|                   | <b>Overdominant</b> GA vs. GG+AA | 43 (41.3)<br>vs. 61 (58.7)  | 8 (44.4) vs. 10 (55.6)     | 0.88 [0.32-2.44]   | 0.81           | 0.5                           |
|                   | <b>Recessive</b> AA vs. GA+GG    | 10 (9.6)<br>vs. 94 (90.4)   | 3 (16.7) vs. 15 (83.3)     | 0.53 [0.13-2.19]   | 0.4            | 0.29                          |

Data are presented as number (%). Abbreviations: please refer to Tables S1 and S2 in supplementary file.

Table S5. Genotypes and alleles distribution.

| <b><i>IL6R</i></b><br><b>SNPs</b> |                             | Number of carriers (%)      |                                        |                                        |                                     |                                    |                                |                             |
|-----------------------------------|-----------------------------|-----------------------------|----------------------------------------|----------------------------------------|-------------------------------------|------------------------------------|--------------------------------|-----------------------------|
|                                   |                             | <b>Allele/<br/>Genotype</b> | <b>RA RF-<br/>positive,<br/>n = 82</b> | <b>RA RF-<br/>negative,<br/>n = 40</b> | <b>RA ACPA-<br/>positive, n=104</b> | <b>RA ACPA-<br/>negative, n=18</b> | <b>RA overall,<br/>n = 122</b> | <b>Controls,<br/>n = 24</b> |
| <b>rs4129267</b>                  | <b>MAF (T allele)</b>       | 29.9%                       | 25%                                    | 29.8%                                  | 19.4%                               | 28.3%                              | 33.3%                          | 30.9%                       |
|                                   | CC                          | 43 (52.4)                   | 22 (55)                                | 54 (51.9)                              | 11 (61.1)                           | 65 (53.3)                          | 11 (45.8)                      | 37 (48.7)                   |
|                                   | CT                          | 29 (35.4)                   | 16 (40)                                | 38 (36.5)                              | 7 (38.9)                            | 45 (36.9)                          | 10 (41.7)                      | 31 (40.8)                   |
|                                   | TT                          | 10 (12.2)                   | 2 (5)                                  | 12 (11.5)                              | 0                                   | 12 (9.8)                           | 3 (12.5)                       | 8 (10.5)                    |
|                                   | <b>Allele/<br/>Genotype</b> |                             |                                        |                                        |                                     |                                    |                                |                             |
| <b>rs2228145</b>                  | <b>MAF (C allele)</b>       | 30.5%                       | 26.3%                                  | 30.3%                                  | 22.2%                               | 29.1%                              | 31.3%                          | 32.2%                       |
|                                   | AA                          | 43 (52.4)                   | 22 (55)                                | 54 (51.9)                              | 11 (61.1)                           | 65 (53.3)                          | 12 (50)                        | 37 (48.7)                   |
|                                   | AC                          | 28 (34.1)                   | 15 (37.5)                              | 37 (35.6)                              | 6 (33.3)                            | 43 (35.2)                          | 9 (37.5)                       | 29 (38.2)                   |
|                                   | CC                          | 11 (13.4)                   | 3 (7.5)                                | 13 (12.5)                              | 1 (5.6)                             | 14 (11.5)                          | 3 (12.5)                       | 10 (13.2)                   |
|                                   | <b>Allele/<br/>Genotype</b> |                             |                                        |                                        |                                     |                                    |                                |                             |

Abbreviations: *IL6R*; Interleukin-6 receptor gene. For other please refer to Table S1 in supplementary file.

Table S6. Distribution of genotypes in a different genetic models between patients and controls.

| <b>IL6R SNPs</b> | <b>Model</b>                        | <b>RA overall,<br/>n=122</b> | <b>Controls,<br/>n=24</b>  | <b>OR (95% CI)</b>   | <b>p-value</b> | <b>Fisher's exact p-value</b> |
|------------------|-------------------------------------|------------------------------|----------------------------|----------------------|----------------|-------------------------------|
| <b>rs4129267</b> | <b>Codominant 1</b> CC vs. CT       | 65 (53.3)<br>vs. 45 (36.9)   | 11 (45.8)<br>vs. 10 (41.7) | 0.76 [0.3-1.96]      | 0.57           | 0.37                          |
|                  | <b>Codominant 2</b> CC vs. TT       | 65 (53.3)<br>vs. 12 (9.8)    | 11 (45.8)<br>vs. 3 (12.5)  | 0.68 [0.16-<br>2.84] | 0.6            | 0.42                          |
|                  | <b>Dominant</b> CT+TT vs. CC        | 57 (46.7)<br>vs. 65 (53.3)   | 13 (54.2)<br>vs. 11 (45.8) | 0.74 [0.31-1.8]      | 0.5            | 0.33                          |
|                  | <b>Overdominant</b> CT vs.<br>CC+TT | 45 (36.9)<br>vs. 77 (63.1)   | 10 (41.7)<br>vs. 14 (58.3) | 0.82 [0.33-<br>2.01] | 0.66           | 0.41                          |
|                  | <b>Recessive</b> TT vs. CC+CT       | 12 (9.8)<br>vs. 110 (90.2)   | 3 (12.5)<br>vs. 21 (87.5)  | 0.76 [0.2-2.98]      | 0.7            | 0.46                          |
| <b>rs2228145</b> | <b>Codominant 1</b> AA vs. AC       | 65 (53.3)<br>vs. 43 (35.2)   | 12 (50)<br>vs. 9 (37.5)    | 0.88 [0.34-<br>2.29] | 0.8            | 0.49                          |
|                  | <b>Codominant 2</b> AA vs. CC       | 65 (53.3)<br>vs. 14 (11.5)   | 12 (50)<br>vs. 3 (12.5)    | 0.86 [0.21-<br>3.53] | 0.84           | 0.54                          |
|                  | <b>Dominant</b> AC+CC vs. AA        | 57 (46.7)<br>vs. 65 (53.3)   | 12 (50)<br>vs. 12 (50)     | 0.88 [0.36-<br>2.12] | 0.77           | 0.47                          |
|                  | <b>Overdominant</b> AC vs.<br>AA+CC | 43 (35.2)<br>vs. 79 (64.8)   | 9 (37.5)<br>vs. 15 (62.5)  | 1.1 [0.44-2.75]      | 0.83           | 0.5                           |
|                  | <b>Recessive</b> CC vs. AA+AC       | 14 (11.5)<br>vs. 108 (88.5)  | 3 (12.5)<br>vs. 21 (87.5)  | 0.91 [0.24-<br>3.48] | 0.89           | 0.56                          |

Data are presented as number (%). Abbreviations: please refer to Tables S1, S2 and S5 in supplementary file.

Table S7. Distribution of genotypes in a different genetic models between rheumatoid factor positive and rheumatoid factor negative patients.

| <b>IL6R SNPs</b> | <b>Model</b>                     | <b>RF positive,<br/>n=82</b> | <b>RF negative,<br/>n=40</b> | <b>OR [95% CI]</b> | <b>p-value</b> | <b>Fisher's exact p-value</b> |
|------------------|----------------------------------|------------------------------|------------------------------|--------------------|----------------|-------------------------------|
| <b>rs4129267</b> | <b>Codominant 1</b> CC vs. CT    | 43 (52.4) vs. 29 (35.4)      | 22 (55) vs. 16 (40)          | 1.08 [0.48-2.42]   | 0.85           | 0.51                          |
|                  | <b>Codominant 2</b> CC vs. TT    | 43 (52.4) vs. 10 (12.2)      | 22 (55) vs. 2 (5)            | 0.39 [0.08-1.99]   | 0.22           | 0.20                          |
|                  | <b>Dominant</b> CT+TT vs. CC     | 39 (47.6) vs. 43 (52.4)      | 18 (45) vs. 22 (55)          | 1.11 [0.51-2.39]   | 0.79           | 0.47                          |
|                  | <b>Overdominant</b> CT vs. CC+TT | 29 (35.4) vs. 53 (64.6)      | 16 (40) vs. 24 (60)          | 0.82 [0.37-1.8]    | 0.62           | 0.38                          |
|                  | <b>Recessive</b> TT vs. CC+CT    | 10 (12.2) vs. 72 (87.8)      | 2 (5) vs. 38 (95)            | 2.64 [0.54-12.87]  | 0.19           | 0.18                          |
| <b>rs2228145</b> | <b>Codominant 1</b> AA vs. AC    | 43 (52.4) vs. 28 (34.1)      | 22 (55) vs. 15 (37.5)        | 1.05 [0.46-2.38]   | 0.91           | 0.54                          |
|                  | <b>Codominant 2</b> AA vs. CC    | 43 (52.4) vs. 11 (13.4)      | 22 (55) vs. 3 (7.5)          | 0.53 [0.13-2.16]   | 0.35           | 0.28                          |
|                  | <b>Dominant</b> AC+CC vs. AA     | 39 (47.6) vs. 43 (52.4)      | 18 (45) vs. 22 (55)          | 1.11 [0.51-2.39]   | 0.79           | 0.47                          |
|                  | <b>Overdominant</b> AC vs. AA+CC | 28 (34.1) vs. 54 (65.9)      | 15 (37.5) vs. 25 (62.5)      | 0.86 [0.39-1.91]   | 0.72           | 0.43                          |
|                  | <b>Recessive</b> CC vs. AA+AC    | 11 (13.4) vs. 71 (86.6)      | 3 (7.5) vs. 37 (92.5)        | 1.91 [0.5-7.38]    | 0.32           | 0.26                          |
|                  |                                  |                              |                              |                    |                |                               |

Data are presented as number (%). Abbreviations: please refer to Tables S1, S2 and S5 in supplementary file.

Table S8. Distribution of genotypes in a different genetic models between anti-citrullinated protein antibodies positive and anti-citrullinated protein antibodies negative patients.

| <i>IL6R</i> SNPs | Model                               | ACPA positive,<br>n=104    | ACPA negative,<br>n=18    | OR [95% CI]           | p-value | Fisher's exact p-value |
|------------------|-------------------------------------|----------------------------|---------------------------|-----------------------|---------|------------------------|
| <b>rs4129267</b> | <b>Codominant 1</b> CC vs. CT       | 54 (51.9)<br>vs. 38 (36.5) | 11 (61.1)<br>vs. 7 (38.9) | 1.11 [0.39-<br>3.15]  | 0.85    | 0.53                   |
|                  | <b>Codominant 2</b> CC vs. TT       | 54 (51.9)<br>vs. 12 (11.5) | 11 (61.1)<br>vs. 0        | nd.                   |         | 0.13                   |
|                  | <b>Dominant</b> CT+TT vs. CC        | 50 (48.1)<br>vs. 54 (51.9) | 7 (38.9)<br>vs. 11 (61.1) | 1.46 [0.52-<br>4.09]  | 0.47    | 0.32                   |
|                  | <b>Overdominant</b> CT vs.<br>CC+TT | 38 (36.5)<br>vs. 66 (63.5) | 7 (38.9)<br>vs. 11 (61.1) | 0.9 [0.32-2.56]       | 0.85    | 0.52                   |
|                  | <b>Recessive</b> TT vs. CC+CT       | 12 (11.5)<br>vs. 92 (88.5) | 0 vs. 18 (100)            | nd.                   |         | 0.13                   |
| <b>rs2228145</b> | <b>Codominant 1</b> AA vs. AC       | 54 (51.9)<br>vs. 37 (35.6) | 11 (61.1)<br>vs. 6 (33.3) | 0.8 [0.27-2.37]       | 0.68    | 0.45                   |
|                  | <b>Codominant 2</b> AA vs. CC       | 54 (51.9)<br>vs. 13 (12.5) | 11 (61.1)<br>vs. 1 (5.6)  | 0.38 [0.04-3.3]       | 0.32    | 0.32                   |
|                  | <b>Dominant</b> AC+CC vs. AA        | 50 (48.1)<br>vs. 54 (51.9) | 7 (38.9)<br>vs. 11 (61.1) | 1.46 [0.52-<br>4.09]  | 0.47    | 0.32                   |
|                  | <b>Overdominant</b> AC vs.<br>AA+CC | 37 (35.6)<br>vs. 67 (64.4) | 6 (33.3)<br>vs. 12 (66.7) | 1.1 [0.38-3.22]       | 0.85    | 0.54                   |
|                  | <b>Recessive</b> CC vs. AA+AC       | 13 (12.5)<br>vs. 91 (87.5) | 1 (5.6)<br>vs. 17 (94.4)  | 2.43 [0.29-<br>20.24] | 0.36    | 0.35                   |

Data are presented as number (%). Abbreviations: please refer to Tables S1, S2 and S5 in supplementary file.



Figure S1. Linkage disequilibrium between rs4969168 and rs4969170.

```
Query SNPs:
rs4969168 (chr17:76353793)
rs4969170 (chr17:76360538)
CEU Haplotypes:
      rs4969170
      A   G
      -----
A | 25  | 1  | 26  (0.131)
rs4969168 -----
G | 43  | 129 | 172 (0.869)
      -----
      68  130  198
      (0.343) (0.657)

G_G: 129 (0.652)
G_A: 43 (0.217)
A_A: 25 (0.126)
A_G: 1 (0.005)

D': 0.9414
R2: 0.2561
Chi-sq: 50.7121
p-value: <0.0001

rs4969168(A) allele is correlated with rs4969170(A) allele
rs4969168(G) allele is correlated with rs4969170(G) allele
```

Figure S2. Linkage disequilibrium between rs4129267 and rs2228145.

```
Query SNPs:
rs4129267 (chr1:154426264)
rs2228145 (chr1:154426970)

CEU Haplotypes:
  rs2228145
  A   C
  -----
  C | 129 | 0 | 129 (0.652)
rs4129267 -----
  T | 0 | 69 | 69 (0.348)
  -----
  129  69  198
  (0.652) (0.348)
  C_A: 129 (0.652)
  T_C: 69 (0.348)
  C_C: 0 (0.0)
  T_A: 0 (0.0)
  D: 1.0
  R2: 1.0
  Chi-sq: 198.0
  p-value: <0.0001
rs4129267(C) allele is correlated with rs2228145(A) allele
rs4129267(T) allele is correlated with rs2228145(C) allele
```
